# Supplementary material
Source: PubMed Central journal article supplement (PMC4247032)

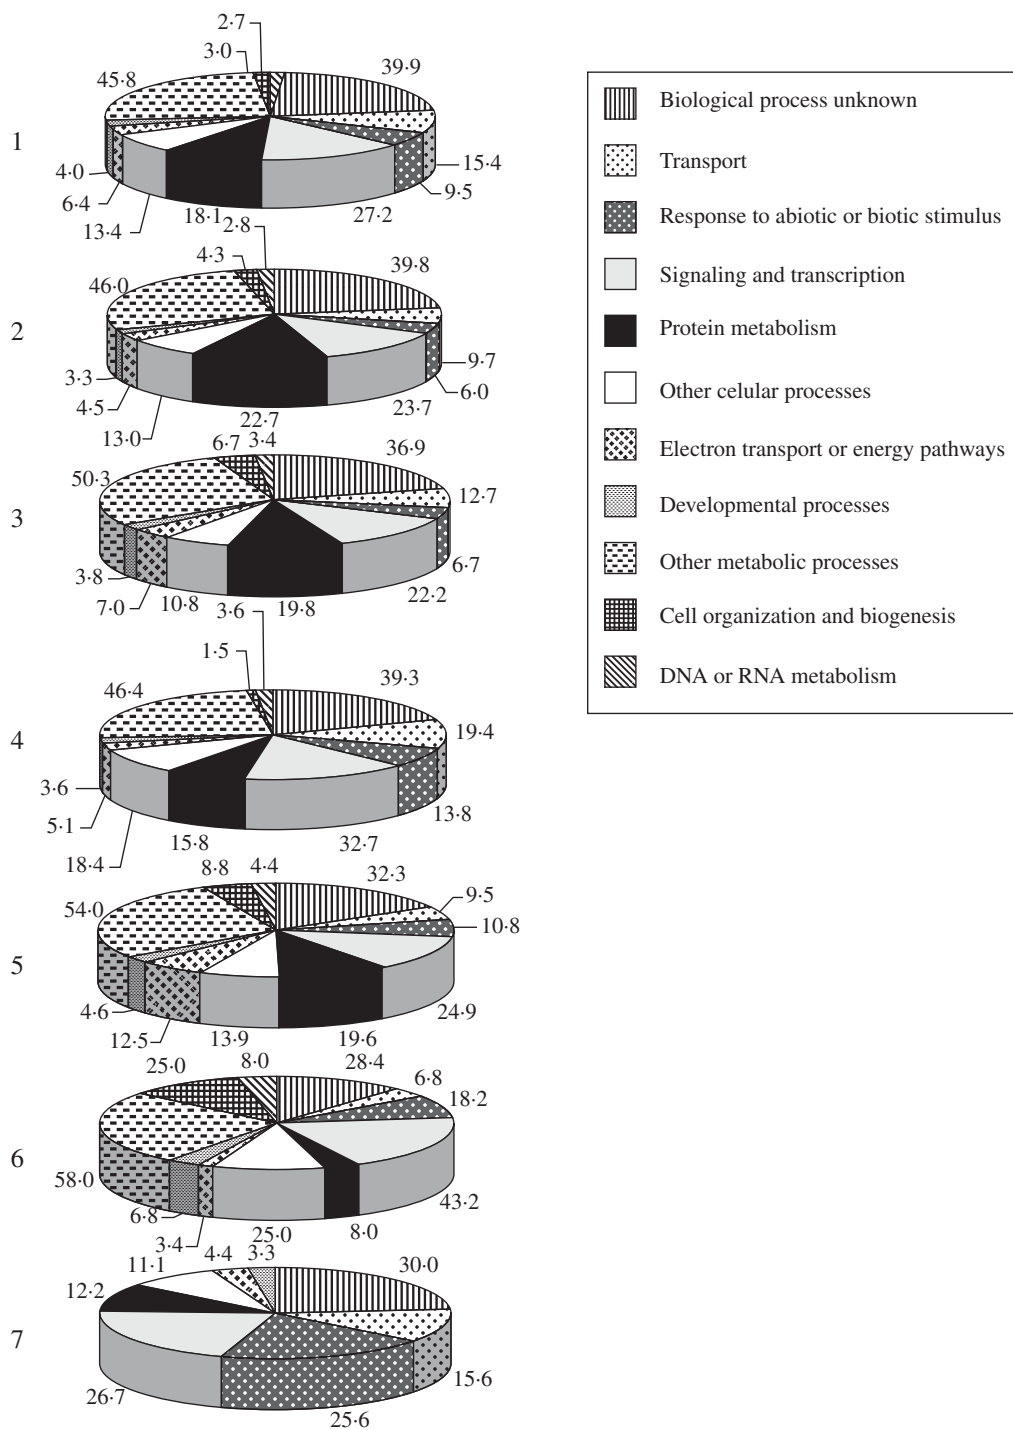

mci217 Supplementary figure

Supplement: supp_mci217_mci217s1.pdf [file supp_mci217_mci217s1.pdf]
